# Supplementary material for: Critical insights into the interactions of heat shock protein 70 with phospholipids
Source: Royal Society of Chemistry journal article supplement (doi:10.1039/d0cp03505j), 2020-01-01
Supplement: d0cp03505j1.pdf [file d0cp03505j1.pdf]

### Supplementary Information

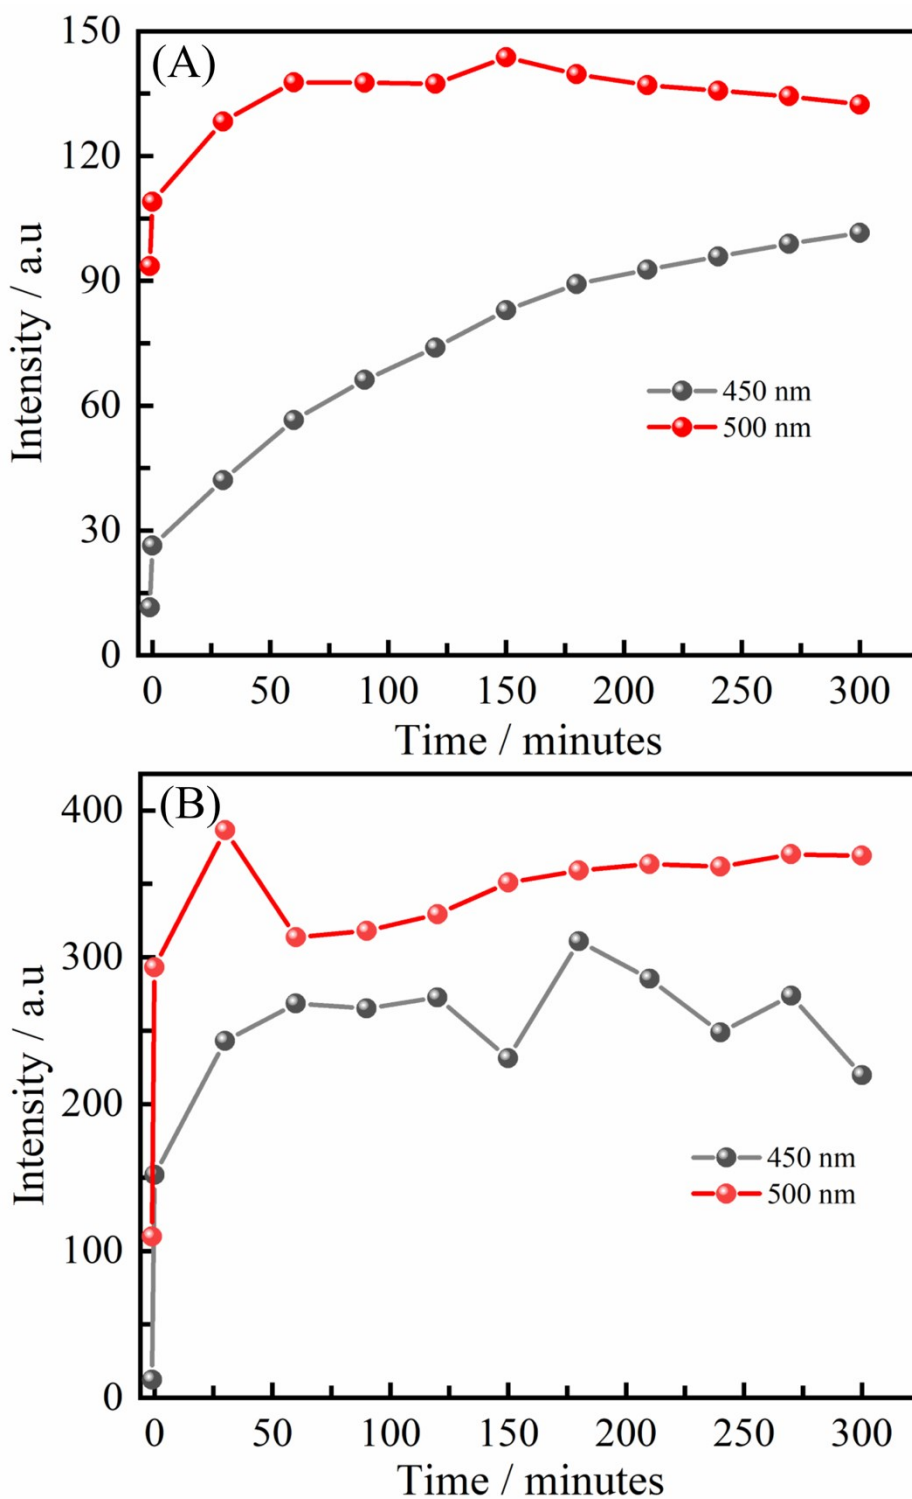

**Figure 1:** Variation of fluorescence intensity on addition of ANS as a function of time in case of (A) Hsp70 (B) Hsp70 inside POPS. Difference in hydrophobic environment around the protein is reflected in variation of fluorescence intensity at 450 nm and 500 nm.

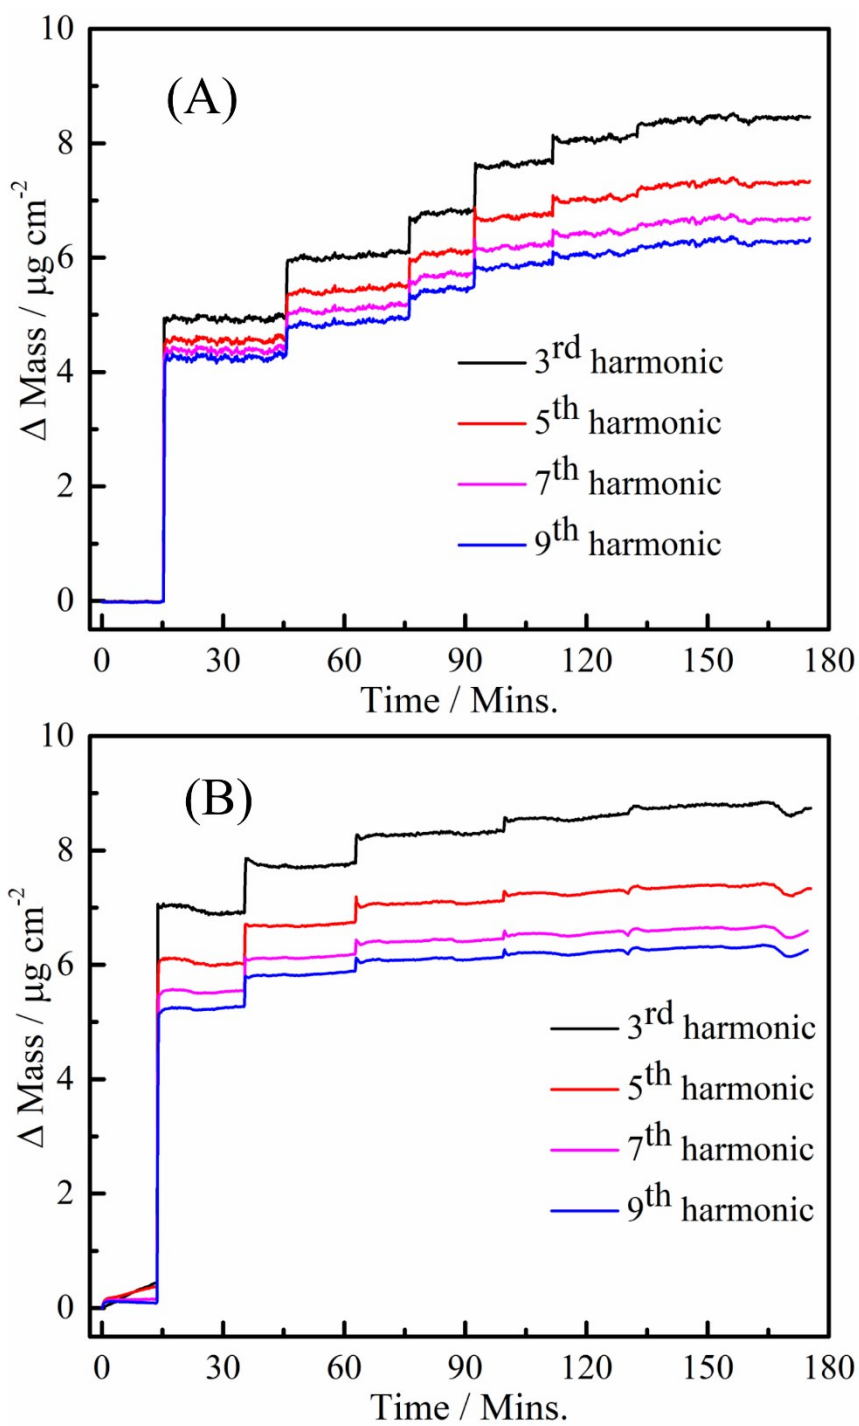

**Figure 2:** QCM-D adsorption plots for Hsp70 solution. (A)  $\Delta$ mass vs time for pure Hsp70 solution on QCM sensor. (B)  $\Delta$ mass vs time for Hsp70 on POPS SLB on QCM sensor.

**Table 1**

Table of secondary structure analysis obtained from deconvolution of the various CD spectra using CDPro software [18]

| <b>Sample</b>          | <b>Helix</b> | <b>Beta</b> | <b>Random coil</b> | <b>Unstructured</b> |
|------------------------|--------------|-------------|--------------------|---------------------|
| Hsp70                  | 51.7         | 9.8         | 16.6               | 21.8                |
| Hsp70 in POPS vesicles | 71.6         | 5.1         | 15.6               | 7.7                 |
